# Supplementary material for: Treatment of collagenase-induced osteoarthritis with a viral vector encoding TSG-6 results in ectopic bone formation
Source: PeerJ. 2018 May 30;6:e4771. doi: 10.7717/peerj.4771 (PMC5984587; doi:10.7717/peerj.4771)
Supplement: Supplemental Information 1 [file peerj-06-4771-s001.xlsx]

## Sheet: Blad1
Figure 1	Bone resorption (% of surface)
no RANKL	PGK-luc	rmTSG6	PGK-TSG6
1.918	12.966	10.049	12.083
2.779	25.522	2.643	10.989
3.067	21.781	2.859	5.287
5.247	20.162	7.342	13.028
Figure 2A	TSG-6 gene expression (-ΔCt, corrected for GAPDH)
CMV-luc	CMV-TSG6
-6.16836	-1.5006
-7.30062	-3.4135
-6.13811	-2.4014
-7.01828	-3.61373
-6.33353	-1.70001
Figure 2B	Prosense day 7 (fluorescence intensity ratio experimental/contralateral)
CMV-luc	CMV-TSG6
1.21	1.66
4.1	2.53
1.11	1.94
0.934	1.13
0.65	2.86
Figure 2D	Cartilage damage
CMV-luc	CMV-TSG6
7.975	7
8.85	3.875
6.95	4.3
16.45	13.15
21.1	10.45
5.4	5.8
6.55	12.625
6.8	8.55
10.125	10.375
8.375	7.75
5.525	18.7
5.625	4.625
7.9	12.875
10.825	6.7
10.175	8.25
Figure 2F	Ectopic bone formation score
CMV-luc	CMV-TSG6
0	4
0	0
0	4
0	2
1	ND
0	1
0	0
0	0
1	1
0	4
0	4
0	ND
1	4
0	5
0	3
